# Supplementary material
Source: PubMed Central journal article supplement (PMC6459121)
Supplement: jamaoncol-5-546-s003.pdf [file jamaoncol-5-546-s003.pdf]

## Data Sharing Statement

Shah. Efficacy and Safety of Pembrolizumab for Heavily Pretreated Patients With Advanced, Metastatic Adenocarcinoma or Squamous Cell Carcinoma of the Esophagus. *JAMA Oncol*. Published December 20, 2018. 10.1001/jamaoncol.2018.5441

### Data

**Data available:** Yes

**Data types:** Deidentified participant data, Other (please specify)

**Additional Information:** clinical study reports

**How to access data:** Merck & Co., Inc.'s data sharing policy, including restrictions, is available at

[http://engagezone.merck.com/ds\\_documentation.php](http://engagezone.merck.com/ds_documentation.php). Requests for access to the clinical study data can be submitted through the EngageZone site or via email to [dataaccess@merck.com](mailto:dataaccess@merck.com).

**When available:** With publication

### Supporting Documents

**Document types:** None

### Additional Information

**Who can access the data:** Qualified Scientific Researchers

**Types of analyses:** for a specific purpose outlined in proposal

**Mechanisms of data availability:** After researcher enters into a standard data sharing agreement and the proposal is approved

**Any additional restrictions:** Researchers must commit to transparency in publication
